1 **Structural anther mimics improve reproductive success through dishonest signalling that**  
2 **enhances both attraction and the morphological fit of pollinators with flowers**

3

4 Ethan L Newman\*, Katharine L Khoury, Sandy E van Niekerk, and Craig I Peter

5 Department of Botany, Rhodes University, PO Box 94, Grahamstown, 6140, South Africa.

6 Corresponding author\*: e.newman@ru.ac.za

7

8 Total Words (Excluding Summary, Tables, Figures, their captions, Acknowledgements, and  
9 References): 5791

10

11 Introduction: 1173

12 Materials and Methods: 2400

13 Results: 643

14 Discussion: 1569

15 Tables: 0

16 Figures: 6 (all in colour)

17

18 Author Contributions: Data collection was performed by all authors. Data analysis was  
19 performed by Katharine Khoury, Ethan Newman and Craig Peter. Ethan Newman wrote the first  
20 draft, all authors contributed to the manuscript.

21

22

23

24

## 25 **Summary**

- 26 • Numerous studies have identified traits associated with pollen mimicry, however, the  
27 processes underlying floral deception remains poorly documented for these structures.  
28 We studied the importance of attraction and mechanical fit of anther mimics in *Tritonia*  
29 *laxifolia* (Iridaceae) and their relative contributions to reproductive success.
- 30 • To determine anther mimics role in pollinator attraction, we offered bees' binary  
31 preferences to flowers painted with UV absorbent and reflecting paint. We also  
32 conducted preference experiments between flowers with excised anther mimics and  
33 unmanipulated controls, from which mechanical fit was assessed using single visits.  
34 Anther mimics effects on female reproductive success was determined using similar  
35 treatments, but on rooted plants.
- 36 • Bees preferred UV absorbent over UV reflecting anther mimics. Preference for flowers  
37 with and without the three-dimensional structures was equal. Single visits resulted in  
38 more pollen deposition on unmanipulated controls over flowers with their anther mimics  
39 excised, which was directly linked to pollen-collecting behaviour. Controls with  
40 unmanipulated anther mimics experienced more seed set than those with their anther  
41 mimics excised.
- 42 • This study provides insights into pollinator-mediated selection on deceptive floral signals  
43 and shows that three-dimensional anther mimics increases reproductive success through  
44 both attraction and pollen collecting behaviours that improves the fit between flowers and  
45 pollinators.

46  
47 **Key words:** *Tritonia laxifolia*, pollen mimicry, seed set, pollen deposition, preferences, colour  
48 perception, pollen-collecting behaviour, morphological fit.

49

50

51

52

## 53 Introduction

54 Many angiosperms exploit the perceptual biases of food-seeking visitors to obtain  
55 pollination services through traits involved in attraction, such as flower colour (Koski, 2020) and  
56 scent (Raguso, 2008). In return, pollinators receive a nutritional reward, with nectar being the  
57 most obvious. However, pollen is often overlooked as a reward but is essential for both solitary  
58 and social bees as provisions for their larvae and energy requirements (Vaudo *et al.*, 2016).  
59 Pollen is also consumed by flies (Holloway, 1976; Wacht *et al.*, 2000), beetles (Steiner, 1998;  
60 Steenhuisen & Johnson, 2012), birds (Coombs & Peter, 2009) and mammals, such as non-flying  
61 mammals (Melidonis & Peter, 2015; Zoeller *et al.*, 2016) and bats (Herrera & Martínez Del Río,  
62 1998; Newman *et al.*, 2021). Because pollen foraging reduces male fitness, to compensate, many  
63 plants have evolved floral signalling structures that imitate pollen and deceive insects into  
64 thinking that they will receive a pollen reward, but improves the reproductive success of the  
65 plant instead (Vogel, 1975; Osche, 1979; Osche, 1983a; Osche, 1983b; Lunau, 2006). This  
66 pollen imitating signals differ from typical nectar guides in that they share yellow, UV absorbent  
67 colours between 500 to 600nm that resemble the bright yellow flavonoids and carotenoids in the  
68 pollenkitt (Harborne & Grayer, 1993). This colouration is thought to be one of the first colour  
69 signals to have evolved in the angiosperms (Lunau, 2000), which is inferred by the pollination of  
70 basal angiosperms by pollen foraging insects (Endress, 1990; Yuan *et al.*, 2008; Bao *et al.*, 2019;  
71 Peris *et al.*, 2020).

72 Consequently, these pollen imitating floral signals are widely documented in the  
73 angiosperms and is found across several plant families and range from two-dimensional "guides"  
74 situated near the flower gullet to three-dimensional structures often associated with staminodes  
75 (Lunau, 2000). Pollen imitating structures have been recorded as vestigial staminodes in the  
76 Bignoniaceae (Guimarães *et al.*, 2008; Milet-Pinheiro & Schlindwein, 2009), Plantaginaceae  
77 (Walker-Larsen & Harder, 2001b; Dieringer & Cabrera, 2002) and Begoniaceae (Agren &  
78 Schemske, 1991; Schemske & Agren, 1995; Schemske *et al.*, 1996). Pollen mimicking labellum  
79 structures and colours have been documented in a range of Batesian mimicry systems in the  
80 Orchidaceae, pointing to the importance of such structures in successfully deceiving pollinators  
81 (Nilsson, 1983; Peter & Johnson, 2008). Additional evidence inferred from a recent case study

82 shows that pollen imitating structures occurs in 28% of all angiosperm flora of the Alps (Lunau  
83 *et al.*, 2017), which suggests that its occurrence may be under-documented.

84 Despite their prevalence, the selective advantage of pollen imitating structures remains  
85 understudied. Studies investigating the occurrence of pollen mimicry, primarily document their  
86 presence or spectral reflectance properties and few investigate the underlying evolutionary  
87 processes. To date, studies have focussed on the functional role of vestigial staminodes (Walker-  
88 Larsen & Harder, 2001b), including their role in attracting pollinators and improving the  
89 morphological fit of pollinators when visiting flowers (Walker-Larsen & Harder, 2001b;  
90 Dieringer & Cabrera, 2002; Guimarães *et al.*, 2008; Milet-Pinheiro & Schlindwein, 2009). These  
91 studies compare components of fitness between flowers with their staminodes excised against  
92 unmanipulated controls, often considering handling time as an additional fitness surrogate.  
93 However, it remains unclear whether improved fitness on unmanipulated controls is the result of  
94 the three-dimensional structure of the pollen mimic creating a hindrance to pollinators accessing  
95 the nectar reward (Martos *et al.*, 2015), or whether reproductive success is improved when  
96 pollen-collecting behaviour is focussed on the anther mimics rather than the functional anthers.

97 Demonstrating the inability of the pollinator (signal receiver) to discriminate between the  
98 signals of the model (pollen) and the mimic (pollen mimic) is a crucial line of evidence for  
99 inferring floral mimicry (Newman *et al.*, 2012; Schiestl & Johnson, 2013), including pollen  
100 mimicry (Lunau, 2000). Although preferences of pollen imitating structures have been  
101 documented (e.g., Duffy & Johnson, 2015; Milet-Pinheiro & Schlindwein, 2009; Lunau, 2014),  
102 the lack of evidence for pollen-collecting behaviour by bees on pollen imitating structures  
103 remain surprising. This is because pollen collection is an essential behaviour of both social and  
104 solitary bees, both of which require pollen as nutritional resources for their brood, and such  
105 pollen imitating structures are likely adaptations to exploit such behaviour. Nevertheless, Vogel  
106 (1978) observed differences in the way that bees handle anther mimics over stamens. His  
107 observations indicate that bees search for pollen using specific behaviours that they do not  
108 exhibit when interacting with anther mimics. However, it is not determined whether it is  
109 experienced bees that exhibit these behaviours or not, leaving the question open on whether bees  
110 exhibit “true” pollen-collecting behaviour on anther mimics (*see* Lunau *et al.*, 2017 for details).  
111 It is also unknown whether pollen-collecting behaviour occurs on both three-dimensional anther

112 mimics and two-dimensional pollen imitating colour markings. For example, Ellis and Johnson  
113 (2010) found that three-dimensional floral signals in *Gorteria diffusa* elicited a higher proportion  
114 of mating behaviours by male bee flies, *Megapalpus capensis*, resulting in higher pollen export  
115 in deceptive morphs with three-dimensional floral signals, compared to varieties with two-  
116 dimensional floral signals. This behaviour is thought to be elicited by a tactile association  
117 between the three-dimensional structure and the pollinator. Indeed, similar outcomes are likely to  
118 occur in flowers with pollen imitating structures; with increased pollen collecting behaviour on  
119 three-dimensional pollen mimics versus two-dimensional pollen imitating markings.

120 *Tritonia* (Iridaceae) is a small African endemic genus of 30 species with pollen imitating  
121 structures ranging from those species having no anther mimics and “unicolour” tepals to two-  
122 dimensional pollen imitating colour markings contrasting against the tepal colours, and three-  
123 dimensional anther mimics formed by raised structures projecting from the tepals, contrasting  
124 strongly with the tepals (**Fig. S1**). *Tritonia laxifolia* Bentham ex Baker (Iridaceae) (**Fig. 1a**) is  
125 one such species with prominent three-dimensional anther mimics on its lower lateral and  
126 median tepals that appear as yellow teeth-like structures (**Fig. 1b**). Using colour vision analysis  
127 combined with binary preferences, single visits, and video recordings, we explore both sensory  
128 and morphological fit of anther mimics with pollinators in this system, including their relative  
129 contribution to fitness. We ask the following broad questions. 1. Do pollinators prefer the colour  
130 and structure of anther mimics? 2. Do three-dimensional anther mimics facilitate the  
131 morphological fit of pollinators with flowers? 3. Do preferences and morphological fit of  
132 pollinators to flowers with structural anther mimics have consequences for female reproductive  
133 success?

134 Specifically, in question 1, we determine whether pollinators prefer yellow painted UV  
135 absorbent anther mimics over orange painted UV reflecting anther mimics, and whether  
136 pollinators prefer three-dimensional anther mimics over two-dimensional pollen imitating  
137 markings. Furthermore, we expect that anther mimics should contrast strongly with all floral  
138 traits and that the anthers should be camouflaged against the dorsal tepals and be  
139 indistinguishable to bees. For question 2, we determine if bees transfer more pollen onto virgin  
140 stigmas of flowers with their anther mimics unmanipulated compared to when they are removed  
141 and determine if this is the result of pollen collecting behaviours. For question 3, we determine

142 whether unmanipulated flowers with anther mimics present set more seed than flowers with  
143 anther mimics removed in a selection experiment that uses the same experimental procedures as  
144 questions 1 and 2.

145

## 146 **Materials and Methods**

### 147 **Study species and localities**

148 *Tritonia laxifolia* (Iridaceae) Bentham ex Baker is a small, deciduous, winter growing  
149 geophyte which flowers from March to June in disturbed habitats along the east coast of Africa  
150 from Port Elizabeth in the Eastern Cape of South Africa to Tanzania (de Vos, 1982). The  
151 scentless, zygomorphic flowers are orange red with the adaxial surface of the dorsal tepal being a  
152 contrasting pale pink. The most striking feature of the flowers are the three peculiar bright  
153 yellow three-dimensional structures on each of the lower tepals referred to here as anther mimics  
154 (Fig. **1a**). In addition, *T. laxifolia* has three inconspicuous, light pink coloured anthers. Receptive  
155 stigmas are deeply divided with three style branches becoming recurved and coarsely pustulate  
156 when receptive (Manning *et al.*, 2002). Flowers typically last between two and three days and are  
157 protandrous with distinct male and female phases (Ethan Newman personal observation).

158 Our study was conducted from April to June in 2019 and 2021, near Fish River Pass,  
159 Kwa-Pikoli (-33.241132°, 27.014889°), (Fig. S2a) and Mosslands farm 18 km south west of  
160 Makhanda/Grahamstown (-33.401357°, 26.432470°), Eastern Cape, South Africa. Here,  
161 *T. laxifolia* occurs on seasonally wet clay in disturbed thicket vegetation dominated *Euphorbia*  
162 *tetragona*, *E. triangularis* and *Aloe ferox*. At both study sites, *T. laxifolia* is primarily visited by  
163 *Amegilla fallax* (Fig. **1b, c**), with *Apis mellifera scutellata* and pollen-collecting bees present in  
164 lower abundance. Medium and large butterflies, *Colotis eris eris*, *Pinacopteryx eriphia eriphia*  
165 and *Papilio demodocus* were abundant and frequently visited the flowers (Fig. S2b, c).

166

### 167 **1. Do pollinators prefer the colour and structure of anther mimics?**

168

## 169 Colour preferences

170 To determine if the yellow UV absorbent colour of anther mimics is important in attraction, we  
171 conducted binary preferences at Mosslands between the 7th and 23<sup>rd</sup> of May 2021, between  
172 0900hrs and 1400hrs at temperatures consistently exceeding 20°C. Fresh flowers were picked  
173 from the field before pollinators arrived. We removed the yellow UV absorbent colour signal  
174 from one-half of the flowers by painting the anther mimics with orange UV reflecting paint  
175 (Dala Neon Orange) that is similar in colouration to the adjacent tepals. We mimicked the yellow  
176 UV absorbent colour of the anther mimics by painting the anther mimics of the other half of the  
177 experimental flowers with UV absorbent yellow paint (Dala craft paint, yellow). Paints were  
178 applied to the entire UV absorbent yellow part of the pollen mimic using a #7 insect pin at least  
179 an hour before preference experiments started and allowed to dry. To control for the potential  
180 influence of the scent of the paints, an equal amount of paint from the opposite treatment was  
181 applied to the inner part of the container serving as a vase to hold the inflorescences. Binary  
182 colour preferences included two experimental trials: 1. Anther mimics painted with yellow UV  
183 absorbent paint versus orange UV reflecting paint. 2. Anther mimics painted with yellow UV  
184 absorbent paint versus unpainted anther mimics. Experiment 1 tests the importance of the UV  
185 absorbent yellow in attracting the pollinator. Experiment 2 is a control that assesses whether the  
186 pollinators are equally attracted to the yellow UV absorbent paint applied in experiment 1 and  
187 unpainted anther mimics.

188 We used the bee interview technique for both experiments [e.g. Johnson *et al.* (2003)], as the  
189 flowers were too numerous within the population to wait for bees to approach stationary arrays.  
190 In these experiments, flower pairs were suspended in two 25ml tubes filled with water and fixed  
191 at the end of a bamboo stick ( $\pm 2$  m), arranged approximately 10 cm apart. Preferences were  
192 executed by placing pairs near a foraging pollinator, and pollinators were offered a binary  
193 preference. We recorded the insect species and the individual pollinators first preference.  
194 Statistical differences within experimental treatments were analysed using generalised linear  
195 mixed-effects models (GLMMs) with binomial error distributions and logit link functions, where  
196 treatments were assigned as fixed factors and binary preferences as the response. Because it was  
197 challenging to swap inflorescences within a pair after each visit to account for non-independent

198 positioning of pairs, specific pairs (i.e., different preference sticks containing choices) were  
199 incorporated as a random factor.

200

## 201 Preference for the physical structure of the anther mimics

202 We picked a total of 128 inflorescences in bud or the early stages of flowering over 17 days  
203 between 20th of May and the 06th of June 2019. As inflorescences matured, we emasculated  
204 flowers using a pair of fine forceps to prevent pollinator preferences from being influenced by  
205 flowers in different stages of anthesis (e.g., pollinators may prefer male phase flowers containing  
206 pollen over female phase flowers). To determine the effects of anther mimics on pollinator  
207 preference, we carefully excised all three anther mimics from all available flowers from exactly  
208 half of the experimental inflorescences (n=64) using a surgical blade. The other half remained  
209 unmanipulated (only the anthers were removed) (n=64). We refer to these inflorescences/flowers  
210 as "anther mimics excised" and "unmanipulated controls" throughout the manuscript (**Fig. S2d**).  
211 Essentially, the excision of the anther mimic removes the physical structure, but the round  
212 yellow mark on the tepal that remains after excision serves as a two-dimensional visual  
213 component of the anther mimic. These inflorescences were kept in a cool room at 10°C until the  
214 stigmas became receptive. Once receptive, experimental inflorescences were used to disentangle  
215 the function of the three-dimensional structure of the anther mimic, using experiments that  
216 simultaneously test the roles of visual signalling and morphological fit (pollen deposition) in the  
217 pollination process, as explained below.

218 To test whether the physical structure of anther mimics is associated with pollinator  
219 attraction, we conducted preference experiments over four days between the 29<sup>th</sup> of May and 04<sup>th</sup>  
220 of June 2019 between 09:00 and 14:00 depending on pollinator activity. Inflorescences with  
221 anther mimics excised and unmanipulated controls were organised into ten pairs with individuals  
222 placed approximately 10 cm apart and spaced about 25 cm from other pairs. These pairs were  
223 arranged at the same height relative to naturally occurring flowering plants within the population,  
224 and the control and experimental inflorescences were matched for the number of open flowers  
225 (either 1 or 2). Once a visitor entered the arena, one of the authors recorded the binary preference  
226 made by visitors to treatments within a pair. Observers also recorded the sequence of visits to  
227 pairs by each pollinator individual. Only first choices were included in the statistical analysis



228 (switches to alternative phenotypes within a pair were excluded from the preference analysis and  
229 only used in the single visit experiments). All pollinators were incorporated in the data analysis.  
230 We treated binary preferences as the response and treatments as fixed factors in a GLMM that  
231 considered a binomial error distribution and a logit link function, with pollinator individual  
232 treated as a random factor to account for non-independence in the data resulting from individual  
233 behaviour.

234

235 To determine whether bees can perceive differences between the anther mimics, anthers,  
236 pollen and adjacent flower tissue including paints used in preference experiments, we measured  
237 colours from different segments of the flower involved in attraction from between four to 13  
238 receptive female phase flowers from different individuals from Makhanda. We separated anther  
239 mimics from the anthers, pollen, dorsal and lateral sepals using a surgical blade. We also painted  
240 the central pollen mimic of ten individuals with UV reflecting orange paint and four individuals  
241 with UV absorbent yellow paint used in colour preferences. Once dry, these were measured,  
242 together with each flower segment over the UV-visible range between 300 to 700nm using an  
243 Ocean Optics S2000+ spectrometer with a DT-mini light source and fibre optic probe (UV/VIS  
244 400µm). To assess the qualitative pattern of UV absorbing and UV reflecting parts of the flower,  
245 we photographed flowers using a UV camera (*Methods S1*).

246 Spectra was then imported into bee colour space (Chittka *et al.*, 1992) using hyperbolically  
247 transformed quantum catches and reflectance spectra of foliage occurring within the immediate  
248 vicinity where preference and selection experiments were conducted (*see Fig. S2a* for an image  
249 of the habitat). We did not use the main attractive surface of the flower as background colour  
250 (either lateral tepal or dorsal tepal), as bees make consistent decisions for experimental flowers  
251 separated by 10cm (see results) which means that actual preferences are considered with  
252 vegetation as the background. Standard D65 daylight illumination was used. To determine  
253 whether 1) bees could perceive differences between the anther mimics and adjacent floral  
254 structures, and 2) between the anthers and adaxial surface of the dorsal tepal, mean Euclidean  
255 distances with bootstrapped 95% confidence intervals were determined as chromatic contrasts.  
256 This was obtained using the *bootcoldist* function implemented in the R package "*pavo*" (Maia *et*

257 *al.*, 2019). Colour distances below the perceptual threshold of 0.11 hexagon units is considered  
258 as indistinguishable by pollinators (Dyer, 2006; Bukovac *et al.*, 2017).

259

## 260 **2. Do anther mimics facilitate morphological fit of pollinators with** 261 **flowers?**

262

### 263 Physical structure of the anther mimic on pollen deposition

264 Single visits to virgin flower were used to test whether anther mimics enhance pollen deposition  
265 to receptive stigmas. We were able to directly link pollinator preferences for the physical  
266 structure of anther mimics (see the previous section) with pollen deposition to treatments in the  
267 following manner: After each foraging bout, the second observer identified the "preferred"  
268 flowers in the experimental array that received a single visit and carefully removed the stigmas  
269 of visited flowers near the base of the ovary. Stigmas were immediately placed in a labelled 2.5  
270 ml centrifuge tube and maintained in an ice filled cooler box while in the field. Experimental  
271 arrays were immediately reconstructed with fresh inflorescences maintaining a constant ten  
272 inflorescence pairs all with virgin flowers. Once a new inflorescence was introduced, the  
273 positions of the treatment was swapped. Stigmas were embedded in heated fuchsin gel mounted  
274 on microscope slides later the same day. A dissecting microscope was used to count the total  
275 number of *T. laxifolia* pollen grains on each stigma. *T. laxifolia* pollen was easily identified  
276 relative to other community members represented in a pollen library of the site.

277 To account for the high number of zeroes in the dataset, that led to overdispersion in an  
278 initial model using a Poisson error distribution, we used a GLMM with a negative binomial error  
279 distribution and log link function (Zuur *et al.*, 2009; Brooks *et al.*, 2019). In our analysis, we  
280 removed butterflies from the full dataset, only retaining bees as the primary pollinators, although  
281 we report on both [i.e., butterflies act as nectar thieves within the Fish River Pass population].  
282 Treatments: flowers with their anther mimics removed and unmanipulated controls species were  
283 assigned as fixed factors, and *T. laxifolia* pollen counts were treated as the response. Individual  
284 visitors were treated as random factors to account for non-independence resulting from similar  
285 pollinator morphology and behaviours.

286

### 287 Physical structure of the pollen mimic on pollen-collecting behaviour

288 To assess whether pollen deposition from single visits is the consequence of pollen-collecting  
289 behaviour exhibited by bees on anther mimics. We extracted behavioural data from 159 videos  
290 recorded during our field season at Mosslands. We set up arrays similar to the experiments  
291 investigating morphological fit described above. This yielded 43 videos of bees on flowers with  
292 the anther mimics excised and 116 on flowers as unmanipulated controls. These videos were  
293 recorded using a Canon 5D MKIV with a 100 mm USM macro lens shot at 30 fps.

294 GLMMs with a binomial error distribution and a logit link function was calculated to determine  
295 a statistical difference in pollen-collecting behaviour. Three separate models were run, namely,  
296 the presence or absence of "scraping" and "pulling" on anther mimics among treatments,  
297 including the "proportion pollen-collecting behaviour that resulted in contact with the  
298 reproductive parts" between treatments. In these models, bee individual was included as a  
299 random factor to account for non-independence regarding individual behaviour.

300

### 301 **3. Do preferences for, and morphological fit on anther mimics have** 302 **consequences for seed set?**

303

304 To determine whether anther mimics are associated with female reproductive success. We  
305 compared seed set from treatments with their anther mimics excised from unmanipulated  
306 controls of naturally occurring rooted plants within the population. Similar to the previous two  
307 experiments, we emasculated all experimental flowers and excised anther mimics from a total of  
308 56 flowers (anther mimics removed) and left anther mimics of 51 flowers intact (unmanipulated  
309 controls). Providing a total of 107 experimental flowers. We covered 28 individuals with their  
310 anther mimics removed and 34 unmanipulated controls (62 treatments) with 33 chicken wire  
311 boxes rooted with steel tent pegs [from a total of 51 inflorescences]. We did this to determine if  
312 butterflies made a significant contribution to fitness. If this is the case, we expect open  
313 treatments to experience a higher proportion seed set than caged individuals. Wire cages had

314 holes large enough to allow bees [*A. fallax* body length: distance from head to tip of abdomen,  
315  $11.07 \pm 0.97$ mm (4)] to enter the cages (25mm holes), (*see* Fig. S2e), but small enough to prevent  
316 white butterflies from entering (EN and SVN personal observation). The remaining 32  
317 inflorescences were left uncaged, containing 28 manipulated and 17 unmanipulated flowers (45  
318 treatments). After three weeks, we collected fruits and discerned fertilised from aborted ovules.  
319 Fertilised ovules were much larger, hard, and green in appearance whereas aborted ovules were  
320 smaller, soft, and shrivelled in appearance.

321         Of the 33 cages setup initially, five were destroyed by cattle, leaving a total of 28 cages  
322 intact. Fruit set from the five destroyed cages were discarded from the analysis. Statistical  
323 differences in the proportion seed set amongst treatments (anther mimics removed and  
324 unmanipulated controls) and exposure (caged versus open) and their interaction were calculated  
325 using GLMM with a beta-binomial error distribution and a logit link function. Individual  
326 inflorescences were treated as a random factor to control for multiple treatments per  
327 inflorescence.

328 All GLMMs were calculated using the *glmmTMB* command from the package "*glmmTMB*",  
329 significance of fixed effects were determined using the ANOVA, type III command from the  
330 "*car*" package (Bolker *et al.*, 2009) and contrasts among interaction terms for the selection  
331 experiment was determined using the *emmeans* command from the package "*emmeans*". All  
332 models were checked using the "*DHARMA*" package. In the process, we discovered that the final  
333 model was overdispersed, and we corrected for overdispersion using a beta-binomial error  
334 distribution to model the proportion seed set from the selection experiment (Harrison, 2015).  
335 Median values and 90% confidence intervals for plotting were obtained from model predictions  
336 using 1000 bootstrap samples calculated using the *bootMer* command from the package "*lme4*".  
337 All data analysis was conducted using the R statistical environment (R Development Core Team,  
338 2021).

339

## 340 **Results**

### 341 **1. Do pollinators prefer the colour and structure of anther mimics?**

342 Colour preferences

343 At Mosslands, 14 *A. fallax* bees showed a significant selection bias for flowers with anther  
344 mimics painted with yellow UV absorbent paint over flowers painted with orange UV reflecting  
345 paint ( $\chi^2=11.00$ ,  $df=1$ ,  $P < 0.001$ , Fig. **2a**). The loci of UV reflecting orange paint being close to  
346 the loci of the orange of adjacent flower tepals in bee colour space (Fig. **1d, 3**; Fig **S3, S4a**). In  
347 contrast, 13 *A. fallax* bees made equal choices between anther mimics painted with yellow UV  
348 absorbent paint over unpainted controls ( $\chi^2=0.15$ ;  $df=1$ ,  $P = 0.70$ , Fig. **2b**), the loci of both these  
349 yellow colours clustering together in bee colour space (Fig. **3, S4b**). Chromatic contrasts reveal  
350 that anther mimics were above the threshold of discrimination of 0.11 hexagon units (Dyer,  
351 2006; Bukovac *et al.*, 2017) when compared to all other floral traits (Fig. **3, S3, S4c**). However,  
352 the anthers were perceptually similar to the adaxial surface of the dorsal tepal, being well below  
353 the threshold of 0.11 hexagon units (Fig. **S4d**).

354

355 **Preference for the physical structure of the anther mimic.**

356 At Fish River Pass, we interviewed 40 insects, of which 20 were bees (16 *A. fallax* and four *A.*  
357 *mellifera scutellata*), and 20 were butterflies (19 *C. eris eris* and one *P. eriphia eriphia*), which  
358 made a total of 88 first preferences. The model including all insects (both bees and butterflies)  
359  $\chi^2=3.81$ ,  $df=1$ ,  $P = 0.051$  showed no significant preference for flowers with or without physical  
360 anther mimics present. Removing butterflies from the dataset, did not alter this result and bees  
361 alone showed no preference for flowers with or without anther mimics ( $\chi^2=0.66$ ,  $df=1$ ,  $P = 0.415$ ,  
362 Fig. **2c**).

363

## 364 **2. Do anther mimics facilitate morphological fit of pollinators with** 365 **flowers?**

366 **Physical structure of the anther mimic on pollen deposition**

367 At Fish River Pass, we obtained a total of 74 single visits from 34 insects. Of these, 41 visits  
368 were made by bees (14 *A. fallax* and two *A. mellifera scutellata*) and 33 by butterflies (17 *C. eris*  
369 *eris* and one *P. eriphia eriphia*). Pollinators deposited significantly more pollen grains onto  
370 virgin stigmas of unmanipulated controls, compared to flowers with their anther mimics removed

371 ( $\chi^2=6.70$ ,  $df=1$ ,  $P=0.009$ ). This result did not change when butterflies were removed from the  
372 dataset, which highlights the significant contribution of bees to pollen deposition in the  
373 experiment ( $\chi^2=5.74$ ,  $df=1$ ,  $P=0.017$ , Fig. 4).

374

### 375 Importance of anther mimic structure for pollen-collecting behaviour

376 At Mosslands, we recorded 155 *A. fallax*, a single Allodape and a single Halictid bee visiting 42  
377 flowers with the anther mimics excised and 115 unmanipulated control flowers. Bees  
378 demonstrated a higher proportion of pollen-collecting behaviour on anther mimics (57.14%),  
379 ( $\chi^2=10.14$ ;  $df=1$ ,  $P=0.001$ ). They exhibited more scraping and pulling behaviour on anther  
380 mimics of unmanipulated controls, compared to when they were excised (scraping:  $\chi^2=8.85$ ;  
381  $df=1$ ,  $P=0.002$ , Fig. 5a; pulling:  $\chi^2=10.10$ ,  $df=1$ ,  $P=0.001$ , Fig. 5b).

382

### 383 Contact with reproductive parts and associated pollen-collecting behaviour

384 The proportion of bees making contact with anthers and stigmas was significantly higher on  
385 unmanipulated controls versus flowers with anther mimics excised ( $\chi^2=30.87$ ,  $df=1$ ,  $P<0.001$ ,  
386 Fig. 5c). The result remained similar when nectar foraging bees were excluded and only pollen  
387 collecting bees considered ( $\chi^2=11.62$ ,  $df=1$ ,  $P<0.001$ ).

388

### 389 **3. Do preferences for, and morphological fit on anther mimics have** 390 **consequences for seed set?**

391 Butterflies did not contribute to seed set at the Fish River Pass site, seed set of the plants caged to  
392 exclude butterflies being similar to controls ( $\chi^2=0.33$ ,  $df=1$ ,  $P=0.69$ , Fig. 6). However, the  
393 removal of the physical anther mimics led to a significant decrease in seed set ( $\chi^2=10.90$ ,  $df=1$ ,  $P$   
394  $<0.001$ , Fig. 6). There was no significant interaction between pollinator exclusion and pollen  
395 mimic excision, and none of the contrasts between caged and open treatments was significant.  
396 ( $\chi^2=0.08$ ,  $df=1$ ,  $P=0.78$ , Fig. 6).

397

## 398 Discussion

399 *Tritonia laxifolia* accomplishes pollination through floral mimicry that deceives the sensory  
400 abilities of the primary bee pollinators through both crypsis, as well as generalised pollen  
401 mimicry. The functional anthers are concealed against the dorsal sepal while physical, three-  
402 dimensional anther mimics deceive pollen collecting bees, focusing their attention on the lower  
403 tepals at the entrance to the flower. Besides the importance of both these visual and tactile  
404 signals, our data show that the three-dimensional anther mimics play a crucial role in precisely  
405 positioning pollinators to deposit pollen on stigmas and presumably remove pollen from anthers

406 Yellow UV absorbing floral signals are considered important in orientating pollen  
407 foraging insects to flowers (Lunau, 2014), and laboratory experiments using untrained naïve  
408 bumblebees (*Bombus terrestris*) demonstrate preferences for the visual signals of anther mimics  
409 by orienting themselves towards the pollen signal of dummy pollen and touching the mimics  
410 with their antennae [see Lunau (2000), Fig. 4 and 10]. Bees in our study selected flowers with  
411 anther mimics painted with yellow UV absorbent paint, exclusively over flowers with mimics  
412 painted with orange paint that reflected UV. The paints used for these manipulations  
413 approximate the respective floral parts in bee colour space, and the bees are unlikely to be able to  
414 distinguish the UV absorbent yellow paint from the unpainted yellow anther mimics, or the  
415 orange UV reflecting paint from the tepals in preference experiments. This is supported by mean  
416 Euclidean distances with confidence intervals that are either less than, or overlaps with the  
417 perceptual threshold of 0.11 hexagon units (Dyer, 2006; Bukovac *et al.*, 2017). Similar  
418 experiments altering the UV colour signal by applying sunscreen to flowers resulted in reduced  
419 preferences by bees (Johnson & Andersson, 2002), which may have consequences for  
420 reproductive success. However, we suspect that the extreme effects of UV alteration in our study  
421 that led to absolute preferences to unpainted controls, may have been the result of bees  
422 specifically foraging for pollen rewards as indicated by a higher proportion of pollen collecting  
423 behaviour on unmanipulated controls compared to nectar foraging (see **Fig. S5**).

424

425 In bee colour space, the colour of the pollen and anthers contrasted strongly with that of  
426 all other floral parts except the pink dorsal tepal directly behind the anthers (**Fig. S4**). We

427 interpret this as a case of crypsis to prevent pollen collecting insects from discovering the anther  
428 and reducing male fitness by collecting pollen as a reward (*see Xiong et al.*, 2019). By  
429 camouflaging the pollen against the background of the dorsal tepal, *T. laxifolia* deceptively  
430 directs attention to the yellow UV absorbing signal of the anther mimics, making bees likely to  
431 ignore the actual pollen of the flower, at least in inexperienced individuals. We have however  
432 observed that bees do collect pollen from flowers by pushing their head against the anthers and  
433 grooming themselves directly afterwards, often occurring following an attempt to remove pollen  
434 from the anther mimics (*Video S1*). Together with the nectar reward, this behaviour may act as a  
435 trade-off to ensure that bees return to flowers, and it is likely that this occurs later in the season  
436 by more experienced bees. However, more research is required to confirm this notion.

437         In contrast to our findings, Duffy and Johnson (2015) showed that yellow anther mimics  
438 and pollen are virtually indistinguishable to bees. In their system, this convergence of colour may  
439 have evolved to increase the display of the pollen reward and increase visitation time on flowers  
440 which may improve reproductive success. This idea is supported in the removal of anther  
441 mimics resulting in decreased preferences to flowers with excised anther mimics and  
442 consequently seed set. When we provided pollinators choices between flowers with the anther  
443 mimics removed and unmanipulated flowers, pollinators did not show any preference. This was  
444 because the excision of the pollen mimic did not remove the yellow UV-absorbing pollen signal  
445 but made it two-dimensional instead. Therefore, we found no significant preference for the three-  
446 dimensional structure of the pollen mimic. Similar experiments have been conducted on  
447 *Jacaranda rugosa* (Bignoniaceae) by Milet-Pinheiro and Schlindwein (2009) that show  
448 decreased visitation to flowers with their staminodes excised. However, in their study, the  
449 excision of the staminode removes the yellow UV absorbent signal which is comparable to our  
450 first experiment where we painted the anther mimics the same colour as the tepals which resulted  
451 in no visits by pollinators.

452         Despite the lack of choices made to the three-dimensional structure of the anther mimic,  
453 pollinators transferred significantly more pollen per single visit on the stigmas of unmanipulated  
454 controls versus flowers with anther mimics excised. This is, in part, the result of the three-  
455 dimensional structure of the anther mimic that decreases the width of the flower entrance  
456 between the anther mimic and the reproductive part of the flower. Preliminary observations by



457 the authority on the genus state that "The function of the calli (anther mimics) is probably to  
458 diminish the space in the throat of the perianth, thus ensuring that a visiting insect will brush  
459 with its back against the anthers and stigmas" (de Vos, 1983). Indeed, the distance between the  
460 closest stigma branch and the top of the anther mimic on the median tepal is  $3.45 \pm 0.19$  mm  
461 ( $n=20$ ), which is 1.28 mm less than the thorax height of the most abundant bee pollinator *A. fallax*  
462  $4.73 \pm 0.07$  mm ( $n=12$ ) (*Methods S2*). Importantly, less abundant butterflies fit poorly with flowers  
463 and the anther mimics. From observations and photographic evidence (**Fig. S2B**) the relatively  
464 long proboscides of the butterflies visiting the flowers results in the insects probing the flowers  
465 between the anther mimics with their heads remaining outside of the flower. As a consequence,  
466 butterflies had remarkably low pollen loads and we did not find a single pollen grain from *T.*  
467 *laxifolia* on any of the wings or heads of the 12 butterflies we swabbed for pollen loads. In  
468 contrast, *A. fallax* carried  $128.9 \pm 40.7$  SE ( $n=10$ ) pollen grains on dorsal section of their thorax  
469 (*Methods S3*).

470 The large pollen loads borne by *A. fallax* translated into the substantial number of pollen  
471 grains deposited on virgin stigmas in single visit experiments. Virgin stigmas of unmanipulated  
472 controls with intact anther mimics received the highest pollen loads compared to control flowers  
473 with their anther mimics removed. Few studies have looked at the effects of structural three-  
474 dimensional anther mimics in enhancing the morphological fit between flowers and pollinators.  
475 The most rigorous studies that do test this, has focused mainly on taxa with vestigial staminodes.  
476 For example, Dieringer and Cabrera (2002) found a statistical difference for pollen deposition in  
477 *Penstemon digitalis* when comparing control flowers with their staminodes intact, with flowers  
478 with their staminodes excised. Similar finding were made by Walker-Larsen and Harder (2001a)  
479 for bee pollinated *P. ellipticus* and *P. palmeri*, but not for hummingbird pollinated *P.*  
480 *centranthifolius* and *P. rostriflorus* with their staminodes retained and excised. None of these  
481 studies associate pollen collecting behaviour with reproductive success, although there is  
482 evidence that the presence of staminodes increase the time spent by pollinators within the flower.

483 Our videos of the behaviours of bees visiting experimental and control flowers allow us to  
484 make a direct link between pollen-collecting behaviour and the amount of contact made with the  
485 reproductive organs. Specifically, we found that pollinators displayed a higher proportion of  
486 scraping and pulling behaviour on flowers with intact anther mimics (**Fig. S5, Video S1**).

487 Reduced pulling behaviours on excised anther mimics is likely the result of a lack of tactile  
488 association with the pollen signal. This has fitness implications for two-dimensional pollen  
489 imitating markings versus three-dimensional anther mimics with regards to attraction and  
490 morphological fit with flowers. Based on our results, pollen imitating markings seem to play an  
491 important role in attraction (Fig. 2a), whereas three-dimensional anther mimics may be important  
492 in both attraction and in eliciting pollen-collecting behaviour. Ellis and Johnson (2010) showed  
493 that ray-florets of the daisy *Gorteria diffusa* with three-dimensional floral signals elicited more  
494 mating attempts by male flies compared to plants with two-dimensional floral signals, resulting  
495 in more pollen export by the three-dimensional deceptive forms.

496 In our study, behaviour on three-dimensional anther mimics is associated with a higher  
497 proportion of contacts to the reproductive parts of the flower, which is directly linked to pollen  
498 deposition and seed set in selection experiments (see Newman *et al.*, 2015). To our knowledge,  
499 this is the first evidence for pollen-collecting behaviour on three-dimensional anther mimics that  
500 improves the morphological fit between flower and pollinators (see Lunau *et al.* 2017). However,  
501 nectar foraging also forces the pollinator to clamber over the anther mimics to access the reward,  
502 leading to a higher proportion of contacts to the reproductive organs in unmanipulated controls  
503 (Fig. 5C). However, pollen collecting behaviour seems to dominate foraging behaviour in the  
504 population as unmanipulated flowers received more than two-fold more pollen collecting  
505 behaviours compared to nectar foraging behaviours per visit as recorded on video (Fig. S5, Video  
506 S1).

507 In conclusion, our study makes the link between female reproductive success and the processes  
508 underlying the evolution of anther mimicry in *T. laxifolia*. We show that the yellow UV  
509 absorbent pollen signal is important in the visual attraction of pollinators to flowers and that the  
510 three-dimensional structures not only elicit pollen-collecting behaviours, but such behaviours  
511 lead to improved pollen deposition and consequently seed set. Future studies should focus on the  
512 generality of pollen-collecting behaviour on two- and three-dimensional pollen imitating  
513 structures, and whether inexperienced naïve bees exhibit a higher proportion of pollen collecting  
514 behaviour compared to more experienced bees.

515

516

517 *Acknowledgements:*

518 We would like to thank the second year Botany class of 2019 of Rhodes University for their  
519 enthusiasm for the initial stages of the project as part of their practical assignment. We thank  
520 Steve Johnson for comments on an earlier version of this study and Tracey Nowell for bringing  
521 us to the attention of the Mosslands population and Barry Hartley for technical assistance. This  
522 project was funded by the research council of Rhodes University, South Africa for ELN and CIP.

523 **Tables and Figures**

524 **Figure 1.** Colour plate of the study system. (a) *Tritonia laxifolia* (Iridaceae) in flower at Kwa-  
525 Pikoli, Fish River Pass. (b) *Amegilla fallax* approaches a flower, the white arrow highlights  
526 three-dimensional anther mimics on each lower tepal. (c) Bee visitor required to crawl onto and  
527 over the anther mimics to contact reproductive parts of the flower. (d) UV images of an  
528 unpainted control (left) and a flower with its anther mimics painted with UV reflecting orange  
529 paint.

530

531 **Figure 2. Figure 2.** Binary preferences of bees based on their first choices (a) between anther  
532 mimics painted with yellow UV absorbent paint and orange UV reflecting paint; (b) choices  
533 between unpainted controls with naturally yellow anther mimics and anther mimics painted with  
534 yellow UV absorbent paint; and (c) choices between unmanipulated controls and flowers with  
535 anther mimics excised. Coloured circles represent median model predictions, error bars refer to  
536 90% confidence intervals for model predictions and small coloured points represent balanced  
537 binary preferences for each treatment.  $ns=P>0.05$ ,  $*=P<0.05$ .

538

539 **Figure 3.** Colour spectra from different parts of the flower plotted in bee colour space. Colours  
540 represent actual colours from respective parts of the flower as perceived by humans. Points with  
541 a black outline are measured from anther mimics painted with either orange UV reflecting paint  
542 or yellow UV absorbing paint. Spectra in the central grey circle appear achromatic to bees (0.1  
543 hexagon units).

544

545 **Figure 4.** Unmanipulated flowers of *Tritonia laxifolia* with anther mimics present, received  
546 significantly more pollen deposited on their stigmas following a single visit by a pollinating bee  
547 compared to flowers with their anther mimics excised. Coloured circles represent median model  
548 predictions, error bars refer to 90% confidence intervals for model predictions and small points  
549 represent the number of pollen grains deposited for each single visit replicate. Inset shows full  
550 extent of data points. \*\*\*  $P < 0.001$ .

551

552 **Figure 5.** Pollinator behaviour recorded on unmanipulated controls compared to flowers with  
553 anther mimics excised. (a) Proportion of visits with bee scraping anther mimics, (b) Proportion  
554 of visits with bees pulling at anther mimics, (c) Proportion of visits by pollen collecting bees  
555 (either scraping or pulling behaviour) contacting reproductive organs. Coloured circles represent  
556 median model predictions, error bars refer to 90% confidence intervals for model predictions and  
557 small points represent binary outcomes. (i.e., presence or absence of behaviour exhibited).  
558 \*\*= $P < 0.01$  \*\*\*  $P < 0.001$ .

559

560 **Figure 6.** Pollinator behaviour recorded on unmanipulated controls compared to flowers with  
561 anther mimics excised. (a) Proportion of visits with bee scraping anther mimics, (b) Proportion  
562 of visits with bees pulling at anther mimics, (c) Proportion of visits by pollen collecting bees  
563 (either scraping or pulling behaviour) contacting reproductive organs. Coloured circles represent  
564 median model predictions, error bars refer to 90% confidence intervals for model predictions and  
565 small points represent binary outcomes. (i.e., presence or absence of behaviour exhibited).  
566 \*\*= $P < 0.01$  \*\*\*  $P < 0.001$ .

567

568

569

570

571

572

573

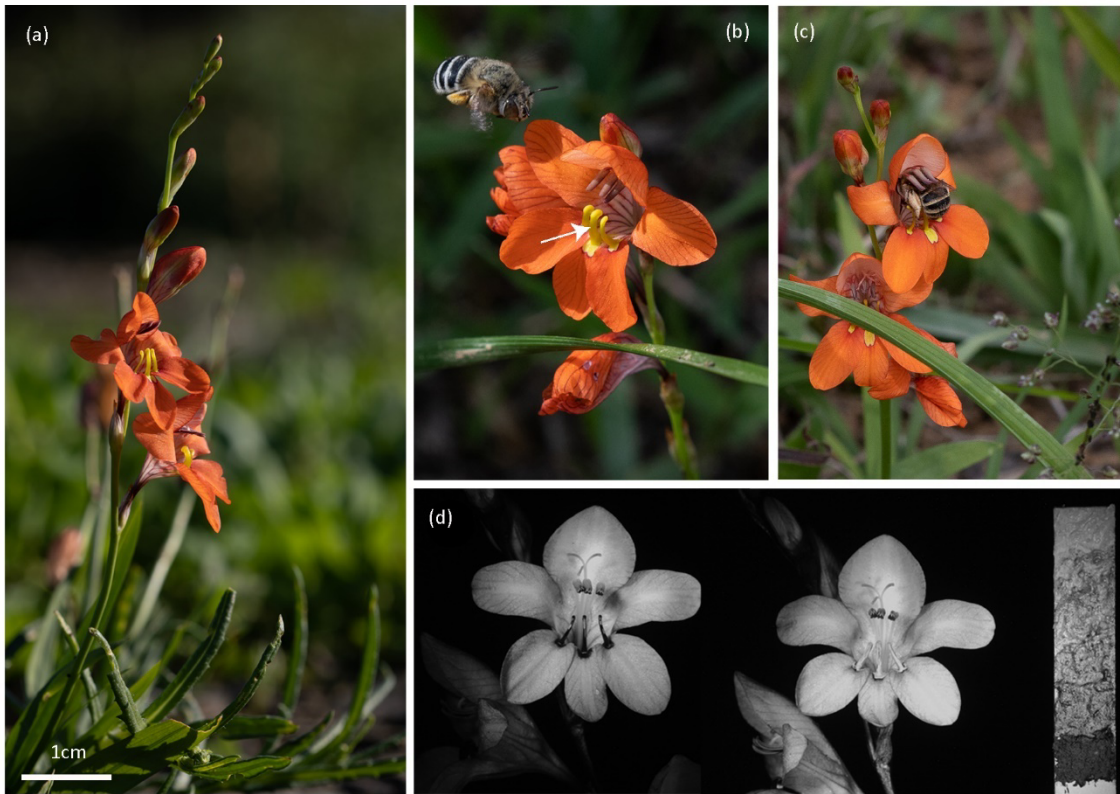

574

575 **Figure 1.** Colour plate of the study system. (a) *Tritonia laxifolia* (Iridaceae) in flower at Kwa-  
576 Pikoli, Fish River Pass. (b) *Amegilla fallax* approaches a flower, the white arrow highlights  
577 three-dimensional anther mimics on each lower tepal. (c) Bee visitor required to crawl onto and  
578 over the anther mimics to contact reproductive parts of the flower. (d) UV images of an  
579 unpainted control (left) and a flower with its anther mimics painted with UV reflecting orange  
580 paint.

581

582

583

584

585

586

587

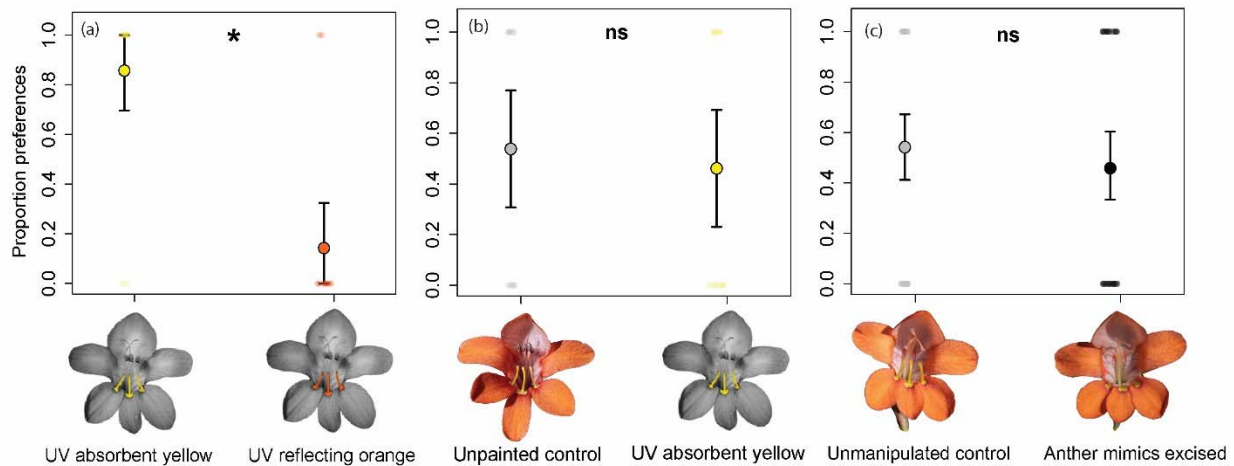

588

589 **Figure 2.** Binary preferences of bees based on their first choices (a) between anther mimics  
590 painted with yellow UV absorbent paint and orange UV reflecting paint; (b) choices between  
591 unpainted controls with naturally yellow anther mimics and anther mimics painted with yellow  
592 UV absorbent paint; and (c) choices between unmanipulated controls and flowers with anther  
593 mimics excised. Coloured circles represent median model predictions, error bars refer to 90%  
594 confidence intervals for model predictions and small coloured points represent balanced binary  
595 preferences for each treatment.  $ns=P>0.05$ ,  $*=P<0.05$ .

596

597

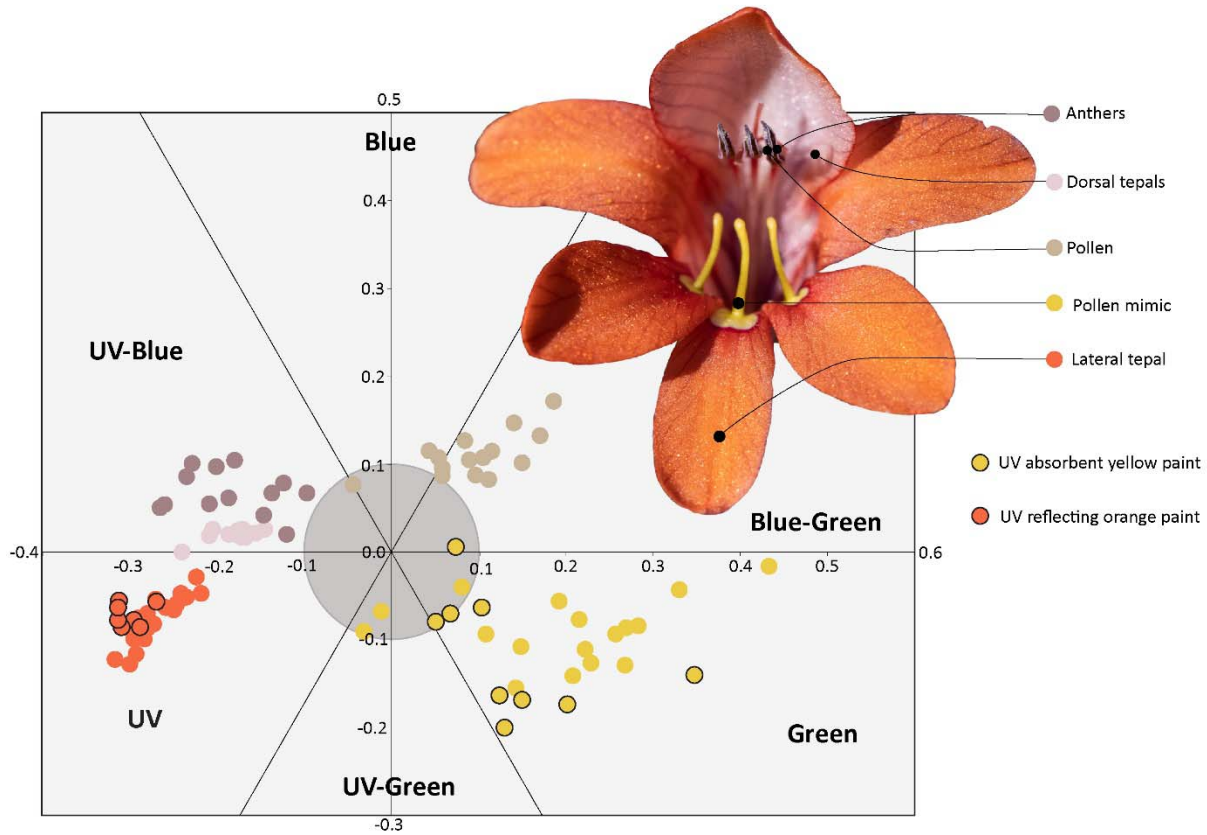

598

599 **Figure 3.** Colour spectra from different parts of the flower plotted in bee colour space. Colours  
600 represent actual colours from respective parts of the flower as perceived by humans. Points with  
601 a black outline are measured from anther mimics painted with either orange UV reflecting paint  
602 or yellow UV absorbing paint. Spectra in the central grey circle appear achromatic to bees (0.1  
603 hexagon units).

604

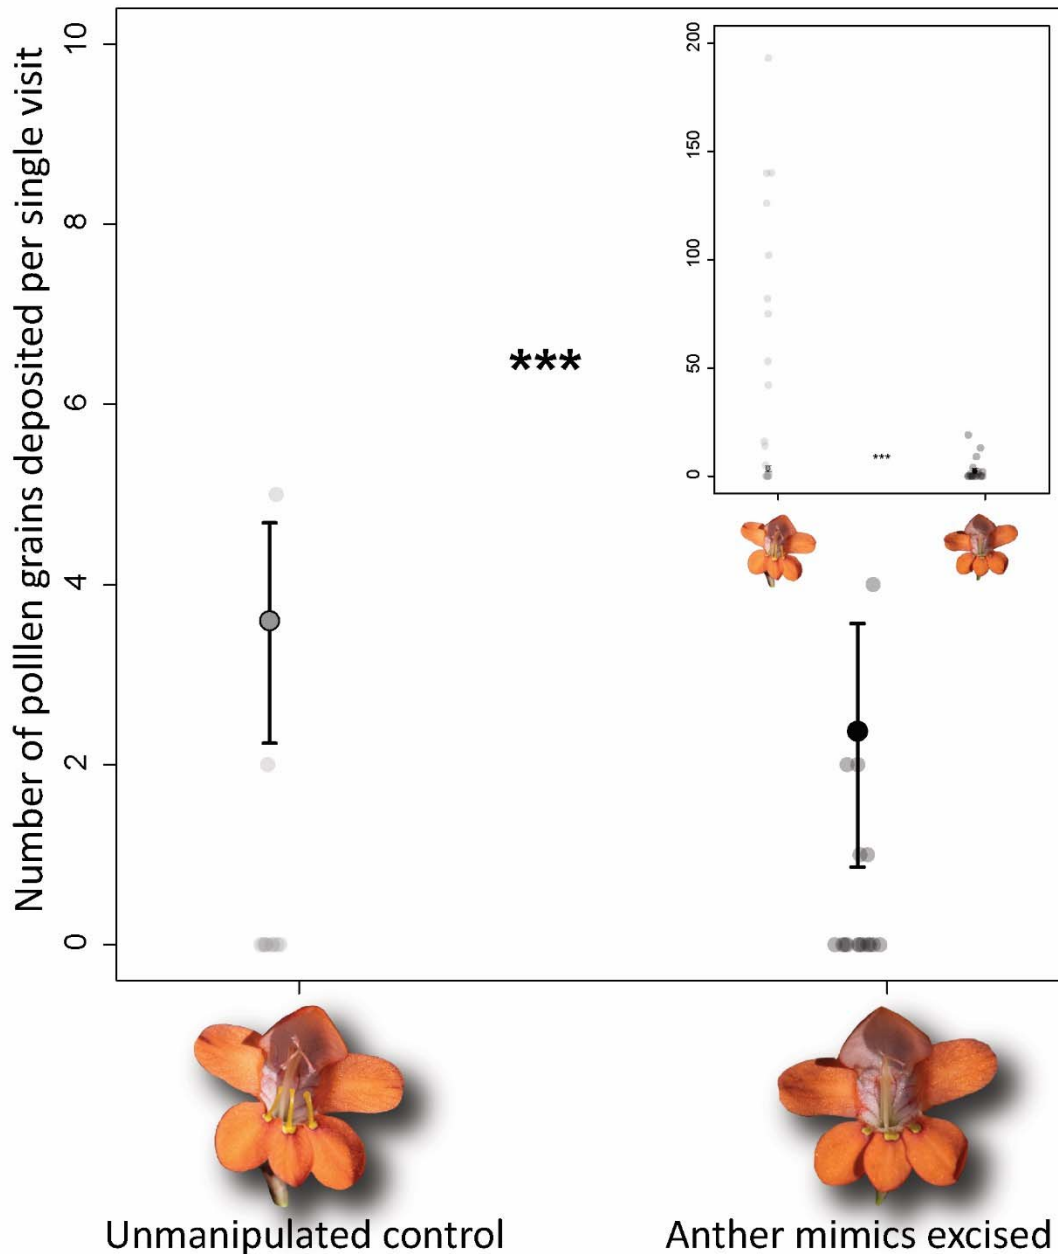

605

606 **Figure 4.** Unmanipulated flowers of *Tritonia laxifolia* with anther mimics present, received  
607 significantly more pollen deposited on their stigmas following a single visit by a pollinating bee  
608 compared to flowers with their anther mimics excised. Coloured circles represent median model  
609 predictions, error bars refer to 90% confidence intervals for model predictions and small points  
610 represent the number of pollen grains deposited for each single visit replicate. Inset shows full  
611 extent of data points. \*\*\*  $P < 0.001$ .



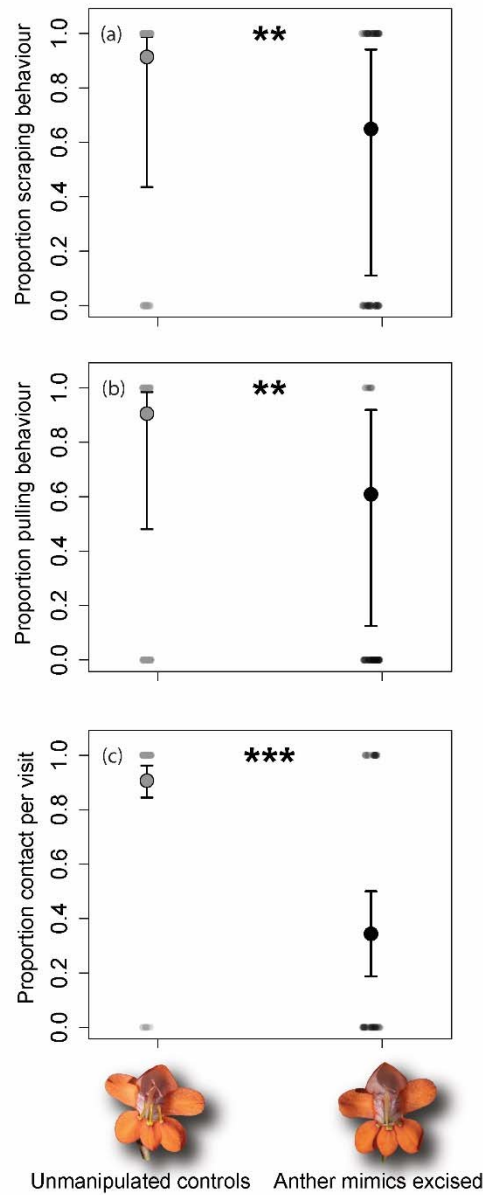

612

613 **Figure 5.** Pollinator behaviour recorded on unmanipulated controls compared to flowers with  
614 anther mimics excised. (a) Proportion of visits with bee scraping anther mimics, (b) Proportion  
615 of visits with bees pulling at anther mimics, (c) Proportion of visits by pollen collecting bees  
616 (either scraping or pulling behaviour) contacting reproductive organs. Coloured circles represent  
617 median model predictions, error bars refer to 90% confidence intervals for model predictions and  
618 small points represent binary outcomes. (i.e., presence or absence of behaviour exhibited).

619 \*\*= $P < 0.01$  \*\*\*  $P < 0.001$ .

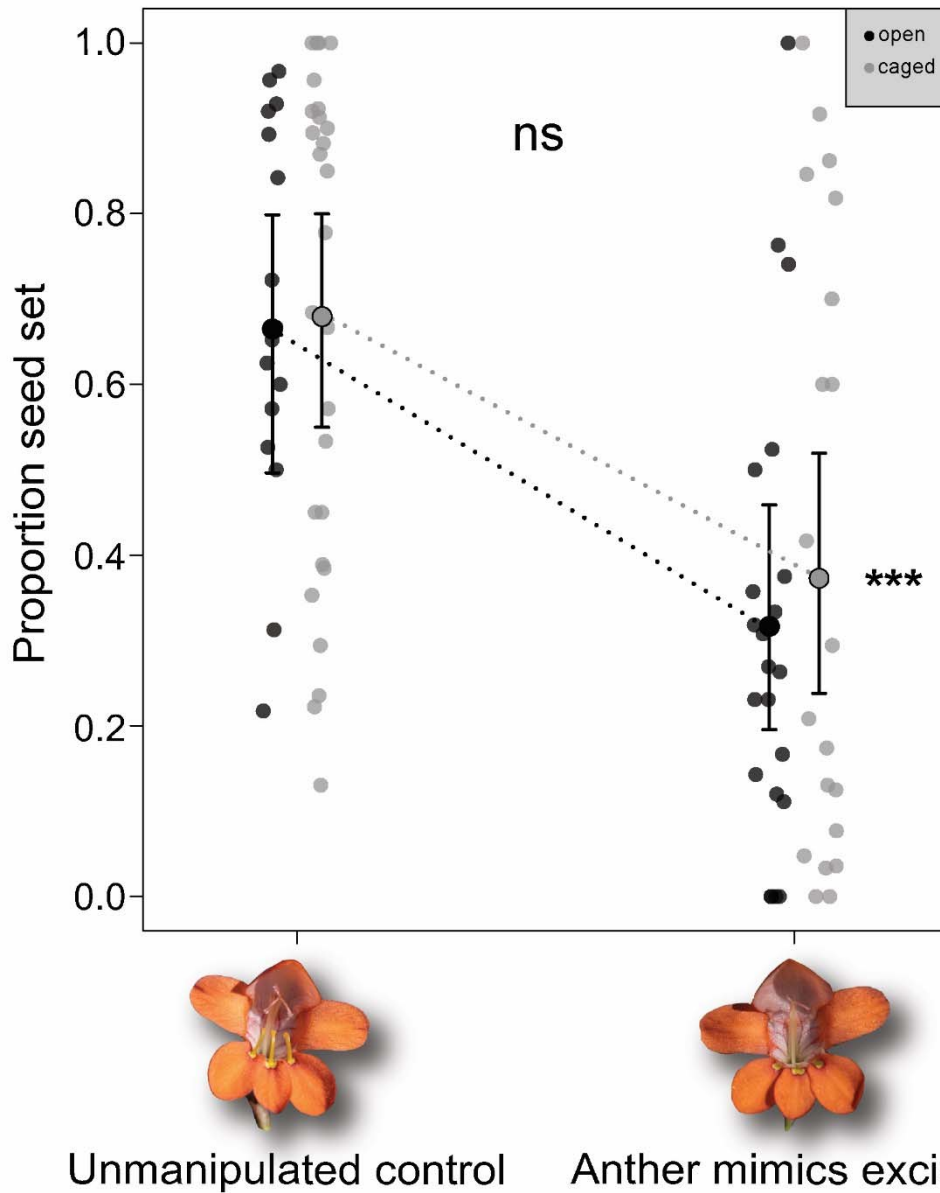

620

621 **Figure 6.** Mean proportion seed set from caged and open treatments on rooted unmanipulated  
622 controls and flowers with their anther mimics removed. Manipulated caged and open treatments  
623 experience significantly lower seed set compared to unmanipulated caged and open treatments.  
624 However, there is no significant difference in seed set within manipulated and unmanipulated  
625 treatments for caged versus open treatments, suggesting that the presence of butterflies in open  
626 treatments did not contribute significantly to seed set. \*\*  $P=0.001$ .

627

## 628 **References**

- 629 **Agren J, Schemske DW. 1991.** Pollination by deceit in a neotropical monoecious herb, *Begonia*  
630 *involucrata*. *Biotropica*: 235-241.
- 631 **Bao T, Wang B, Li J, Dilcher D. 2019.** Pollination of Cretaceous flowers. *Proceedings of the National*  
632 *Academy of Sciences* **116**(49): 24707-24711.
- 633 **Bolker BM, Brooks ME, Clark CJ, Geange SW, Poulsen JR, Stevens MHH, White J-SS. 2009.** Generalized  
634 linear mixed models: a practical guide for ecology and evolution. *Trends in Ecology & Evolution*  
635 **24**(3): 127-135.
- 636 **Brooks ME, Kristensen K, Darrigo MR, Rubim P, Uriarte M, Bruna E, Bolker BM. 2019.** Statistical  
637 modeling of patterns in annual reproductive rates. *Ecology* **100**(7): e02706.
- 638 **Bukovac Z, Shrestha M, Garcia JE, Burd M, Dorin A, Dyer AG. 2017.** Why background colour matters to  
639 bees and flowers. *Journal of Comparative Physiology A* **203**(5): 369-380.
- 640 **Chittka L, Beier W, Hertel H, Steinmann E, Menzel R. 1992.** Opponent colour coding is a universal  
641 strategy to evaluate the photoreceptor inputs in Hymenoptera. *Journal of Comparative*  
642 *Physiology A* **170**(5).
- 643 **Coombs G, Peter C. 2009.** Do floral traits of *Strelitzia reginae* limit nectar theft by sunbirds? *South*  
644 *African Journal of Botany* **75**(4): 751-756.
- 645 **de Vos MP. 1982.** The African genus *Tritonia* Ker Gawler (Iridaceae): Part1. *South African Journal of*  
646 *Botany*.
- 647 **Dieringer G, Cabrera L. 2002.** The interaction between pollinator size and bristle staminode of  
648 *Penstemon digitalis* (Scrophulariaceae). *American Journal of Botany* **89**: 991 - 997.
- 649 **Duffy KJ, Johnson SD. 2015.** Staminal hairs enhance fecundity in the pollen-rewarding self-incompatible  
650 lily *Bulbine abyssinica*. *Botanical Journal of the Linnean Society* **177**(3): 481-490.
- 651 **Duffy KJ, Johnson SD, Peter CI. 2014.** A temporal dimension to the influence of pollen rewards on bee  
652 behaviour and fecundity in *Aloe tenuior*. *PLOS ONE* **9**(4): e94908.
- 653 **Dyer AG. 2006.** Discrimination of flower colours in natural settings by the bumblebee species *Bombus*  
654 *terrestris* (Hymenoptera: Apidae). *Entomologia generalis*: 257-268.
- 655 **Ellis A, Johnson SD. 2010.** Floral mimicry enhances pollen export: The evolution of pollination by sexual  
656 deceit outside of the Orchidaceae. *The American Naturalist* **176**(5): E143-E151.
- 657 **Endress PK. 1990.** Evolution of reproductive structures and functions in primitive angiosperms  
658 (Magnoliidae). *Memoirs New York Bot. Gard.* **55**: 5-34.

- 659 **Guimarães E, Di Stasi LC, Maimoni-Rodella RDCS. 2008.** Pollination biology of *Jacaranda oxyphylla* with  
660 an emphasis on staminode function. *Annals of Botany* **102**(5): 699-711.
- 661 **Hansen DM, Van Der Niet T, Johnson SD. 2012.** Floral signposts: testing the significance of visual 'nectar  
662 guides' for pollinator behaviour and plant fitness. *Proceedings of the Royal Society B: Biological*  
663 *Sciences* **279**(1729): 634-639.
- 664 **Harborne JB, Grayer RJ. 1993.** *Flavanoids and insects*. London: Chapman and Hall.
- 665 **Harrison XA. 2015.** A comparison of observation-level random effect and Beta-Binomial models for  
666 modelling overdispersion in Binomial data in ecology & evolution. *PeerJ* **3**: e1114.
- 667 **Herrera ML, Martínez Del Río C. 1998.** Pollen digestion by New World bats: effects of processing time  
668 and feeding habits. *Ecology* **79**(8): 2828-2838.
- 669 **Holloway BA. 1976.** Pollen-feeding in hover-flies (Diptera: Syrphidae). *New Zealand journal of zoology*  
670 **3**(4): 339-350.
- 671 **Johnson SD, Andersson S. 2002.** A simple field method for manipulating ultraviolet reflectance of  
672 flowers. *Canadian Journal of botany* **80**(12): 1325-1328.
- 673 **Johnson SD, Dafni A. 1998.** Response of bee-flies to the shape and pattern of model flowers:  
674 implications for floral evolution in a Mediterranean herb. *Functional Ecology* **12**(2): 289-297.
- 675 **Johnson SD, Midgley JJ. 1997.** Fly pollination of *Gorteria diffusa* (Asteraceae), and a possible mimetic  
676 function for dark spots on the capitulum. *American Journal of Botany* **84**(4): 429-436.
- 677 **Johnson SD, Peter CI, Nilsson LA, Ågren J. 2003.** Pollination success in a deceptive orchid is enhanced by  
678 co-occurring rewarding magnet plants. *Ecology* **84**(11): 2919-2927.
- 679 **Koski MH. 2020.** The role of sensory drive in floral evolution. *New Phytologist* **227**(4): 1012-1024.
- 680 **Lunau K. 2000.** The ecology and evolution of visual pollen signals. *Plant Systematics and Evolution* **222**(1-  
681 4): 89-111.
- 682 **Lunau K. 2006.** Stamens and mimic stamens as components of floral colour patterns. *Bot. Jarhb. Syst.*  
683 **127**: 13 - 41.
- 684 **Lunau K. 2014.** Visual ecology of floes with particular reference to colour vision and colour preferences.  
685 *J Comp Physiol A* **200**: 497 - 512.
- 686 **Lunau K, Konzmann S, Winter L, Kamphausen V, Ren Z-X. 2017.** Pollen and stamen mimicry: the alpine  
687 flora as a case study. *Arthropod-Plant Interactions* **11**(3): 427-447.
- 688 **Maia R, Gruson H, Endler JA, White TE. 2019.** pavo 2: New tools for the spectral and spatial analysis of  
689 colour in r. *Methods in Ecology and Evolution* **10**(7): 1097-1107.
- 690 **Manning JC, Goldblatt P, Snijman D. 2002.** *The color encyclopedia of Cape bulbs*. Oregon: Timber Press.

- 691 **Martos F, Cariou ML, Pailler T, Fournel J, Bytebier B, Johnson SD. 2015.** Chemical and morphological  
692 filters in a specialized floral mimicry system. *New Phytologist* **207**(1): 225-234.
- 693 **Melidonis CA, Peter CI. 2015.** Diurnal pollination, primarily by a single species of rodent, documented in  
694 *Protea foliosa* using modified camera traps. *South African Journal of Botany* **97**: 9-15.
- 695 **Milet-Pinheiro P, Schlindwein C. 2009.** Pollination in *Jacaranda rugosa* (Bignoniaceae): Euglossine  
696 pollinators, nectar robbers and low fruit set. *Plant Biology* **11**(2): 131-141.
- 697 **Newman E, Anderson B, Johnson SD. 2012.** Flower colour adaptation in a mimetic orchid. *Proceedings*  
698 *of the Royal Society B: Biological Sciences* **279**(1737): 2309-2313.
- 699 **Newman E, Govender K, Niekerk S, Johnson SD. 2021.** The functional ecology of bat pollination in the  
700 African sausage tree *Kigelia africana* (Bignoniaceae). *Biotropica* **53**(2): 477-486.
- 701 **Newman E, Manning J, Anderson B. 2015.** Local adaptation: Mechanical fit between floral ecotypes of  
702 *Nerine humilis* (Amaryllidaceae) and pollinator communities. *Evolution* **69**(9): 2262-2275.
- 703 **Nilsson LA. 1983.** Mimesis of bellflower (*Campanula*) by the red helleborine orchid *Cephalanthera rubra*.  
704 *Nature* **305**(5937): 799-800.
- 705 **Osche G. 1979.** Zur Evolution optischer Signale in der Coevolution von Pflanze und Tier. *Biol. Ons. Zeit.* **9**:  
706 161 - 170.
- 707 **Osche G. 1983a.** Optische Signale in der Coevolution bei Planze, und Tier. *Ber. Deutsch. Bot. Ges.* **96**: 1 -  
708 27.
- 709 **Osche G. 1983b.** Zur Evolutio optischer signale bei Pflanze, Tier und Mensch. *Ernst-Haeckel-Vorlesung un*  
710 *der Friedrich-Schiller-Universität Jena*: 4 - 35.
- 711 **Peris D, Labandeira CC, Barron E, Delclos X, Rust J, Wang B. 2020.** Generalist pollen-feeding beetles  
712 during the mid-Cretaceous. *Iscience* **23**(3): 100913.
- 713 **Peter CI, Johnson SD. 2008.** Mimics and magnets: the importance of color and ecological facilitation in  
714 floral deception. *Ecology* **89**(6): 1583-1595.
- 715 **Peter CI, Johnson SD. 2013.** Generalized food deception: colour signals and efficient pollen transfer in  
716 bee-pollinated species of *Eulophia* (Orchidaceae). *Botanical Journal of the Linnean Society* **171**:  
717 713 - 729.
- 718 **R Development Core Team 2021.** R: A Language and Environment for Statistical Computing. Vienna,  
719 Austria: R Foundation for Statistical Computing.
- 720 **Raguso RA. 2008.** Wake up and smell the roses: the ecology and evolution of floral scent. *Annual review*  
721 *of ecology, evolution, and systematics* **39**: 549-569.

- 722 **Schemske DW, Agren J. 1995.** Deceit pollination and selection on female flower size in *Begonia*  
723 *involucrata*: an experimental approach. *Evolution*: 207-214.
- 724 **Schemske DW, Ågren J, Corff JL 1996.** Deceit Pollination in the Monoecious, Neotropical Herb *Begonia*  
725 *oaxacana* (Begoniaceae). Springer US, 292-318.
- 726 **Schiestl FP, Johnson SD. 2013.** Pollinator-mediated evolution of floral signals. *Trends in Ecology &*  
727 *Evolution* **28**(5): 307-315.
- 728 **Shi J, Luo YB, Bernhardt P, Ran JC, Liu ZJ, Zhou Q. 2009.** Pollination by deceit in *Paphiopedilum*  
729 *barbigerum* (Orchidaceae): a staminode exploits the innate colour preferences of hoverflies  
730 (Syrphidae). *Plant Biology* **11**(1): 17-28.
- 731 **Steenhuisen S-L, Johnson SD. 2012.** Evidence for beetle pollination in the African grassland sugarbushes  
732 (*Protea*: Proteaceae). *Plant Systematics and Evolution* **298**(5): 857-869.
- 733 **Steiner KE. 1998.** Beetle pollination of peacock moraeas (Iridaceae) in South Africa. *Plant Systematics*  
734 *and Evolution* **209**(1-2): 47-65.
- 735 **Vaudo AD, Patch HM, Mortensen DA, Tooker JF, Grozinger CM. 2016.** Macronutrient ratios in pollen  
736 shape bumble bee (*Bombus impatiens*) foraging strategies and floral preferences. *Proceedings of*  
737 *the National Academy of Sciences* **113**(28): E4035-E4042.
- 738 **Vogel S. 1975.** Mutualismus und Parasitismus in der Nutzung von Pollenträgern. *Verh. Dtsch. Zool. Ges.*  
739 **68**: 102 -110.
- 740 **Vogel S. 1978.** *Evolutionary shifts from reward to deception in pollen flowers*. London: Academic Press.
- 741 **Wacht S, Lunau K, Hansen K. 2000.** Chemosensory control of pollen ingestion in the hoverfly *Eristalis*  
742 *tenax* by labellar taste hairs. *Journal of Comparative Physiology A* **186**(2): 193-203.
- 743 **Walker-Larsen J, Harder LD. 2001a.** The evolution of staminodes in angiosperms: patterns of stamen  
744 reduction, loss, and functional re-invention. *American Journal of Botany* **87**(10): 1367-1384.
- 745 **Walker-Larsen J, Harder LD. 2001b.** Vestigial organs as opportunities for functional innovation: The  
746 example of the *Penstemon* staminode. *Evolution* **55**(3): 477-487.
- 747 **Xiong YZ, Jia L, Zhang C, Huang S. 2019.** Color matching between pollen and corolla: hiding pollen via  
748 visual crypsis. *New Phytologist*.
- 749 **Yuan L-C, Luo Y-B, Thien LB, Fan J-H, Xu H-L, Yukawa J, Chen Z-D. 2008.** Pollination of *Kadsura*  
750 *longipedunculata* (Schisandraceae), a monoecious basal angiosperm, by female, pollen-eating  
751 *Megommata* sp.(Cecidomyiidae: Diptera) in China. *Biological Journal of the Linnean Society*  
752 **93**(3): 523-536.

753 **Zoeller K, Steenhuisen S-L, Johnson S, Midgley J. 2016.** New evidence for mammal pollination of *Protea*  
754 species (Proteaceae) based on remote-camera analysis. *Australian Journal of Botany* **64**(1): 1-7.

755 **Zuur A, Ieno EN, Walker N, Saveliev AA, Smith GM. 2009.** *Mixed effects models and extensions in*  
756 *ecology with R*: Springer Science & Business Media.

757

758

759

760

761

762

763

764

765

766

767

768

769

770

771

772

773

774

775

776

777 **Supplementary Materials**

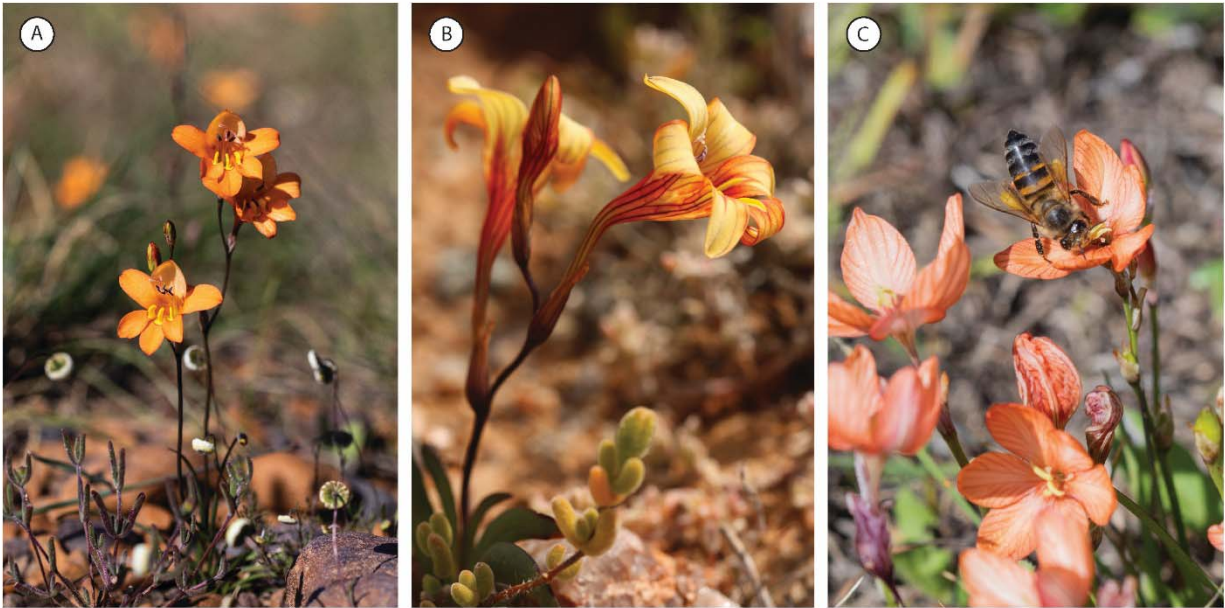

778

779 **Fig. S1** A subset of species from the genus *Tritonia* (Iridaceae) with structural variation in their anther  
780 mimics. A) *Tritonia securigera* from Joubertina (Eastern Cape) has “axe-like” three-dimensional anther  
781 mimics, B) *T. karoica* from the Roggeveld, (Northern Cape) has slightly raised anther mimics, and C) *T.*  
782 *dubia* from Gqeberha (Eastern Cape) has no anther mimics. Instead, yellow pollen from *T. dubia* anthers  
783 attracts honeybees *Apis mellifera scutellata* in search of pollen. All images by Ethan Newman.



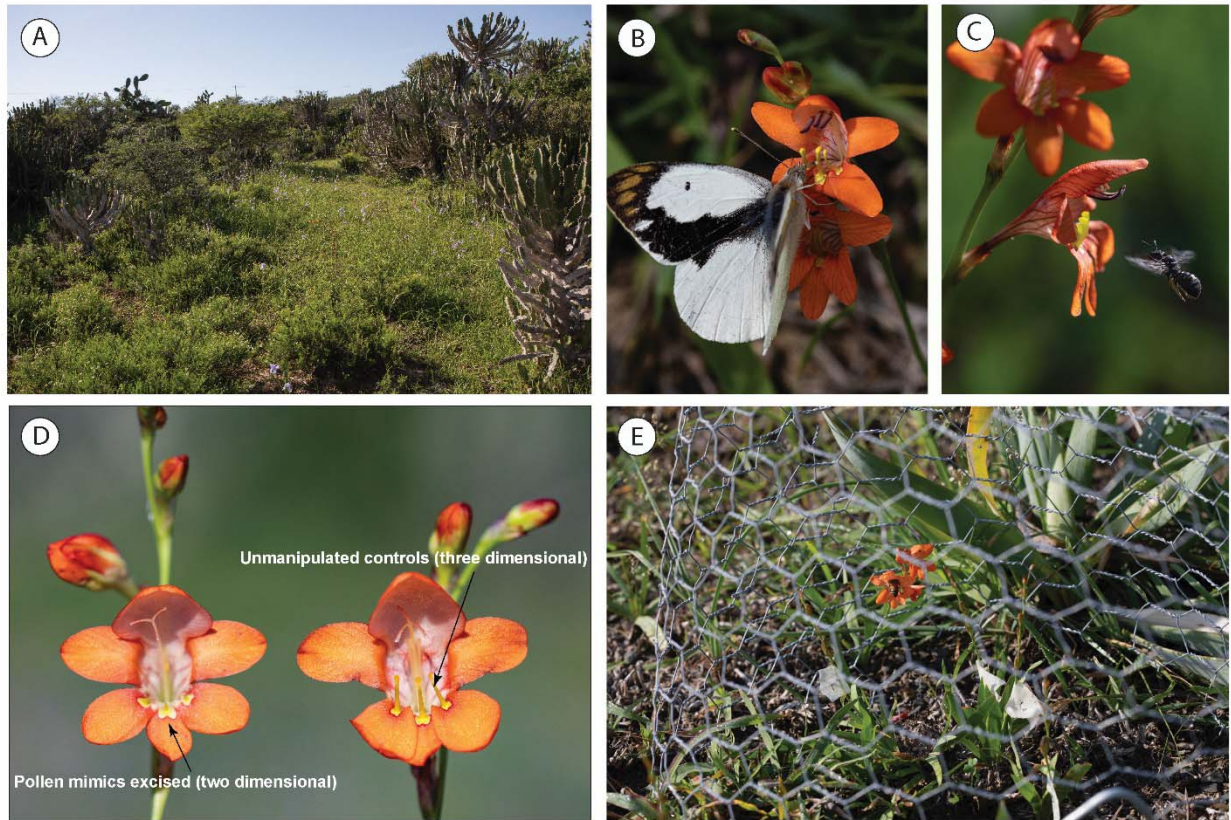

**Fig. S2** A) Study site where we performed preference and selection experiments near Fish River Pass, Kwa-Pikoli in the Eastern Cape Province of South Africa. B) Gold tip butterfly *Colotis eris eris* thieving nectar from flowers of *Tritonia laxifolia* at the study site. Notice the lack of contact made to the anthers. C) *Allodape* pollen collecting bees approaching a flower of *T. laxifolia* at Makhanda. D) Experimental plants prepared for preference, single visit or selection experiments with the anthers removed in bud and stigmas are receptive, whereby the pollen mimic is excised for one of the treatments, leaving a two-dimensional pollen imitating marking (left), and a flower with the anther mimics kept intact retaining its three-dimensional structure (right). E) Experimental cages placed over rooted plants in the field to exclude butterflies but allowing bees to enter. Notice the bee foraging on the inflorescence inside the cage. All images by Ethan Newman.

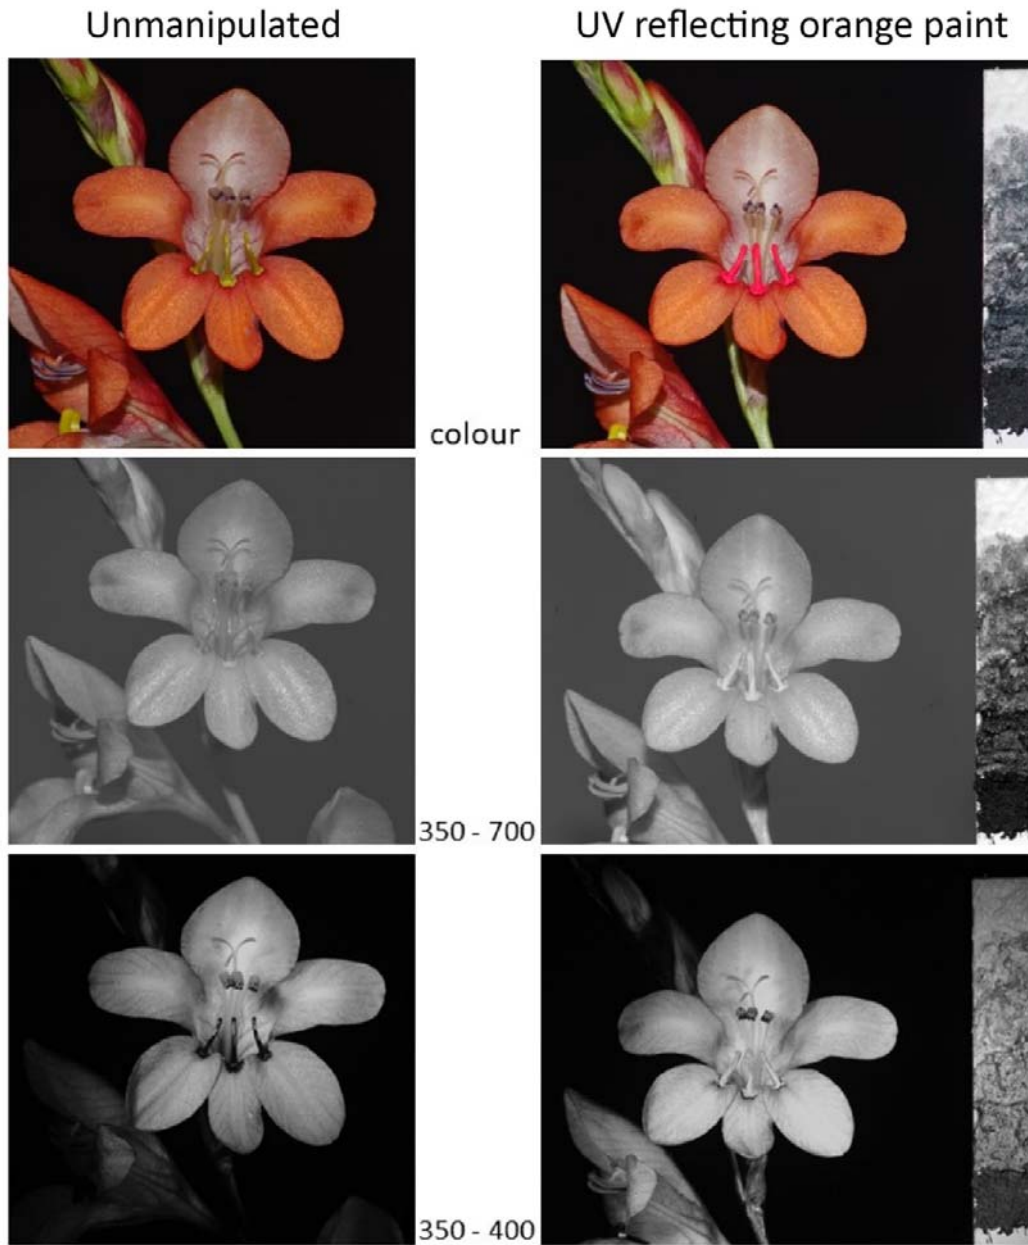

1

2 **Fig. S3** Images on the left represent unpainted and unmanipulated flowers, images on the right have  
3 UV reflecting orange paint added to the anther mimics. The first row shows these flowers in colour,  
4 the second row between 350 and 700nm, and the last row in the UV range between 350 to 400nm.  
5 Notice the UV absorbent properties of the pollen mimic on the unmanipulated flowers on the left  
6 versus the UV reflecting paint on the right that appear similar to the tepals. All images by Craig  
7 Peter.

8

9

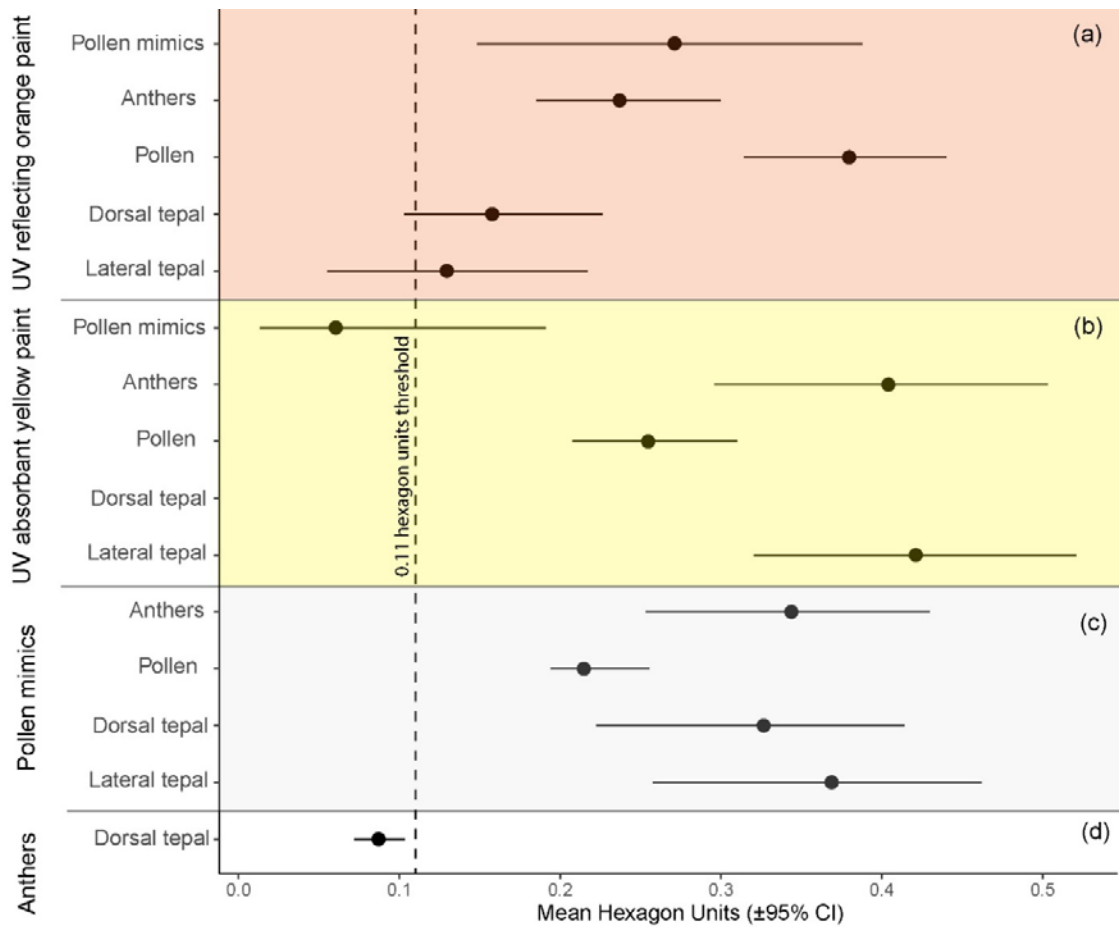

10

11 **Fig. S4** Chromatic contrasts based on Euclidean distances between spectra of different floral traits  
 12 plotted in bee colour space. (a) UV reflecting orange paint used in colour preferences against floral  
 13 traits, (b) UV absorbent yellow paint used in colour preferences against floral traits, (c)  
 14 unmanipulated anther mimics against floral traits. (d) comparison between anthers and dorsal  
 15 tepals.

16

17

18

19

20

21

22

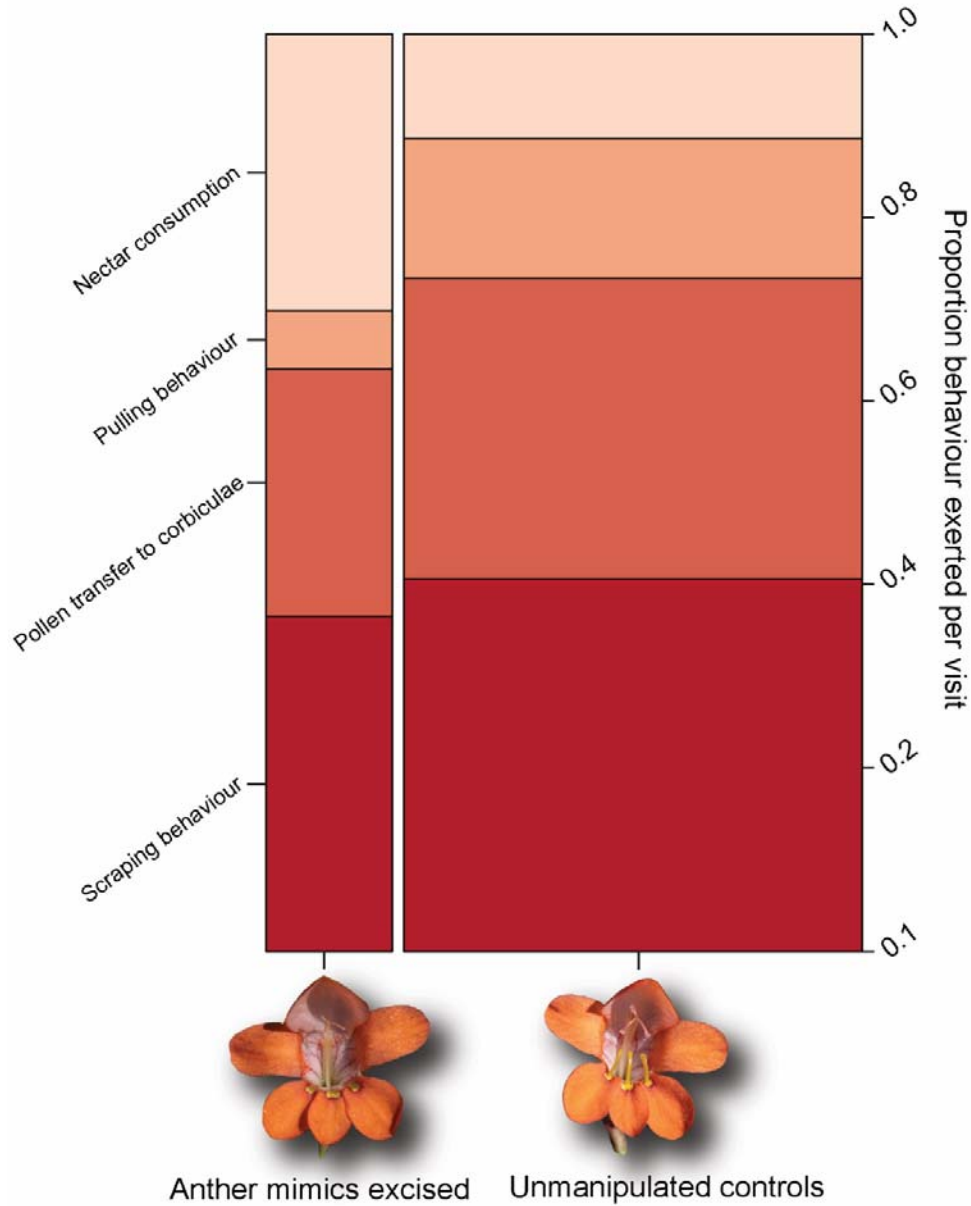

23

24 **Fig. S5** Spine plot illustrating the proportion pollinator behaviour exhibited per single visit by bees.

25 Width of plot represents the number of observations relative to the opposite bar. (i.e., there are

26 more observations of bee behaviour on unmanipulated treatments compared to manipulated

27 treatments).

28

29

30

31

32 **Methods S1** *UV photography*

33 To assess the qualitative pattern of UV absorbing and UV reflecting parts of the flowers in  
34 both unmanipulated flowers and the painted treatments, flowers were photographed in the near UV  
35 range (~350 to 400 nm). This was done using a Pentax K7 subjected to a "full-spectrum" conversion,  
36 having the low pass filter covering the sensor removed. A Pentax FA 100mm F3.5 macro lens and a  
37 2-inch Baader Planetarium U-Filter were used, which only transmits wavelengths between 320 and  
38 380 nm. Flowers to be imaged were illuminated with 12V led lights with an emission peak at 365  
39 nm. To judge exposures, a greyscale was constructed using different Magnesium Oxide to Carbon  
40 powder ratios and mixed with clear "cold" wood glue to paint the mixture on a white cardboard  
41 strip.

42

43

44

45

46

47

48

49

50

51

52

53

54

55

56

57

58

59 **Methods S2** *Measurements associated with morphological fit*

60 Floral traits putatively involved in pollination namely tube length, all three calli, the closest distance  
61 between the central anther mimic and a stigma branch as well as the measurement between the  
62 central lower tepal without the anther mimic and closest stigma branch, were measured from 19  
63 individuals in open receptive female phase flowers. Due to differences in the foraging behaviour of  
64 different functional pollinator groups, we measured tube length in two ways. Bees forage for nectar  
65 by crawling over the calli and into the flower gullet. Hence, the first measurement was taken in a  
66 straight-line distance from the top of the ovary to a notch in the perianth tube which represents the  
67 maximum depth that a bee visitor can insert its head required to access the nectar at the bottom.  
68 Butterflies on the other hand forage by holding onto the lower tepals and forcing their proboscis  
69 through openings between the anther mimics to access the nectar. Hence, flower depth for  
70 butterflies was measured as the sum of the first and second measurement, where the second  
71 measurement was simply the straight-line distance from the notch in the perianth tube to the  
72 furthest distance of the anther mimic with which the head of the butterfly theoretically contacts.

73

74 Insect traits potentially important in the pollination process were measured. For *Amegilla*  
75 bees we measured the fully extended proboscis length from the base of the maxilla to the tip of the  
76 glossa, a measurement that corresponds with the depth of the perianth tube (tube length  
77 measurement 1). Thorax depth was measured as the straight-line distance between the dorsal and  
78 ventral portion of the mesothorax. A measurement which corresponds with the distance between  
79 the raised nectar guides and the anthers/stigmas. To determine whether butterflies can access  
80 nectar from the bottom of the perianth tubes of *Tritonia* flowers, we measured proboscis length  
81 from all butterflies as the straight-line distance from the base of the proboscis to the tip, by  
82 extending the knee bend. A measurement that corresponds with the depth of the perianth tube (The  
83 sum of tube length measurements 1 and 2). All measurements were taken using a set of digital  
84 callipers calibrated to 0.1 millimeter.

85

86

87

88

89

90 **Methods S3** *Determining the number of pollen grains on pollinators*

91 During pollinator preference experiments, one of the observers (ELN) walked through the population  
92 at Fish River Pass and caught all insects visiting *T. laxifolia* flowers. On the 19<sup>th</sup> of May 2019 we  
93 captured all visitors actively foraging on *T. laxifolia* by insect net and killed them by freezing them on  
94 site. Bees were placed in a tapering 150 ml tube with their headfirst, to restrict their movements as  
95 much as possible to prevent pollen from falling off and moving to different parts of their bodies.  
96 Butterflies were killed by gently squeezing their thorax following capture, inserting them in resting  
97 position in a wax paper envelope (Bio Quip Products, California, USA) before freezing.

98 To assess the degree of morphological fit of flowers with different functional pollinator  
99 groups, we counted the number of *T. laxifolia* pollen grains exported on the bodies of captured  
100 insects. *Tritonia laxifolia* pollen was counted from 12 Anthophorid bees (*Amegilla* sp.), 11 Gold tip  
101 butterflies (*Colotis eris eris*). For each individual insect, fuchsin gel was gently dabbed onto the area  
102 of pollen deposition. For bees, fuchsin gel was dabbed onto the top of the bees' head, dorsal section  
103 of the thorax and forewings and for butterflies, fuchsin gel was dabbed onto the proboscis, top of  
104 head and first half of the dorsal section of the thorax. Using reference slides, *T. laxifolia* pollen was  
105 discerned from pollen of all plant species in the community visited by the respective visitors to *T.*  
106 *laxifolia*.

107

108

109

110

111

112

113

114

115

116

117 **Video/Movie S1** Video clip illustrating pollen-collecting behaviour exerted on anther mimics by bees

118
